# Supplementary material
Source: Research Square preprint supplement (doi:10.21203/rs.3.rs-8947555/v1)
Supplement: Supplementary file 1 [file 32c971eee4951da62f648026.pdf]

# **SUPPLEMENTARY INFORMATION**

## **A MULTI-DIMENSIONAL APPROACH COMBINING HPLC, ION MOBILITY AND HIGH RESOLUTION MASS SPECTROMETRY FOR INVESTIGATING TRANSITION METAL COMPLEXES**

Laura Zellner<sup>1\*</sup>, Julian Süß<sup>2,3</sup>, Samuel Vorbach<sup>3</sup>, Uwe Monkowius<sup>2,4</sup>, Markus Himmelsbach<sup>1</sup>,  
Stephan Hann<sup>5</sup>, Christian Klampfl<sup>1</sup>

<sup>1</sup> Johannes Kepler University Linz, Institute of Analytical and General Chemistry, Altenberger  
Strasse 69, 4040 Linz, Austria

<sup>2</sup> Johannes Kepler University Linz, School of Education, Chemistry, Altenberger Strasse 69,  
4040 Linz, Austria

<sup>3</sup> Johannes Kepler University Linz, Institute of Catalysis, Altenberger Strasse 69, 4040 Linz,  
Austria

<sup>4</sup> Johannes Kepler University Linz, Institute of Inorganic Chemistry, Altenberger Strasse 69,  
4040 Linz, Austria

<sup>5</sup> BOKU University, Institute of Analytical Chemistry, Department of Natural Sciences and  
Sustainable Resources, Muthgasse 18, Vienna 1190, Austria

\*Correspondence to Laura Zellner (E-mail: [laura.zellner@jku.at](mailto:laura.zellner@jku.at)), Tel +43 732 2468 9707

**Supplementary Table S1:** Sum formulas and monoisotopic masses (calculated using *enviPat* <sup>1</sup>) of the herein investigated group six transition metal complexes.

| <b>Abbreviation</b> | <b>Complex</b>                        | <b>Sum formula</b>                                               | <b>Monoisotopic mass / Da</b> |
|---------------------|---------------------------------------|------------------------------------------------------------------|-------------------------------|
| <b>W-1</b>          | CpW(CO) <sub>2</sub> PN               | C <sub>21</sub> H <sub>21</sub> NO <sub>2</sub> PW               | 534.0819                      |
| <b>W-2</b>          | CpW(CO) <sub>2</sub> PP               | C <sub>33</sub> H <sub>29</sub> O <sub>2</sub> P <sub>2</sub> W  | 703.1152                      |
| <b>W-3</b>          | CpW(CO) <sub>2</sub> PPP*             | C <sub>41</sub> H <sub>38</sub> O <sub>2</sub> P <sub>3</sub> W  | 839.1594                      |
| <b>W-4</b>          | W(ACN) <sub>3</sub> (CO) <sub>3</sub> | C <sub>9</sub> H <sub>9</sub> N <sub>3</sub> O <sub>3</sub> W    | 391.0153                      |
| <b>W-5</b>          | W(Py) <sub>2</sub> (CO) <sub>4</sub>  | C <sub>14</sub> H <sub>10</sub> N <sub>2</sub> O <sub>4</sub> W  | 454.0150                      |
| <b>W-6</b>          | CpW(CO) <sub>2</sub> PPP              | C <sub>48</sub> H <sub>44</sub> O <sub>2</sub> P <sub>3</sub> W  | 929.2063                      |
| <b>Mo-1</b>         | CpMo(CO) <sub>2</sub> PPP             | C <sub>48</sub> H <sub>44</sub> O <sub>2</sub> P <sub>3</sub> Mo | 843.1608                      |
| <b>Mo-2</b>         | Mo(Py) <sub>2</sub> (CO) <sub>4</sub> | C <sub>14</sub> H <sub>10</sub> N <sub>2</sub> O <sub>4</sub> Mo | 367.9695                      |
| <b>W-7</b>          | W(CO) <sub>4</sub> PN                 | C <sub>18</sub> H <sub>16</sub> NO <sub>4</sub> PW               | 525.0326                      |
| <b>Cr-1</b>         | Cr(CO) <sub>4</sub> PN                | C <sub>18</sub> H <sub>16</sub> NO <sub>4</sub> PCr              | 393.0222                      |
| <b>W-8</b>          | W(iPrBiOx)(CO) <sub>4</sub>           | C <sub>16</sub> H <sub>20</sub> N <sub>2</sub> O <sub>6</sub> W  | 520.0831                      |
| <b>Mo-3</b>         | Mo(iPrBiOx)(CO) <sub>4</sub>          | C <sub>16</sub> H <sub>20</sub> N <sub>2</sub> O <sub>6</sub> Mo | 434.0375                      |
| <b>W-9</b>          | IndPhosW                              | C <sub>28</sub> H <sub>22</sub> ClO <sub>2</sub> PW              | 640.0555                      |
| <b>Mo-4</b>         | IndPhosMo                             | C <sub>28</sub> H <sub>22</sub> ClO <sub>2</sub> PMo             | 554.0100                      |
| <b>Cr-2</b>         | Cr(dppm)(CO) <sub>4</sub>             | C <sub>29</sub> H <sub>22</sub> O <sub>4</sub> P <sub>2</sub> Cr | 548.0398                      |
| <b>W-10</b>         | W(dppm)(CO) <sub>4</sub>              | C <sub>29</sub> H <sub>22</sub> O <sub>4</sub> P <sub>2</sub> W  | 680.0503                      |
| <b>Mo-5</b>         | Mo(dppm)(CO) <sub>4</sub>             | C <sub>29</sub> H <sub>22</sub> O <sub>4</sub> P <sub>2</sub> Mo | 595.0047                      |

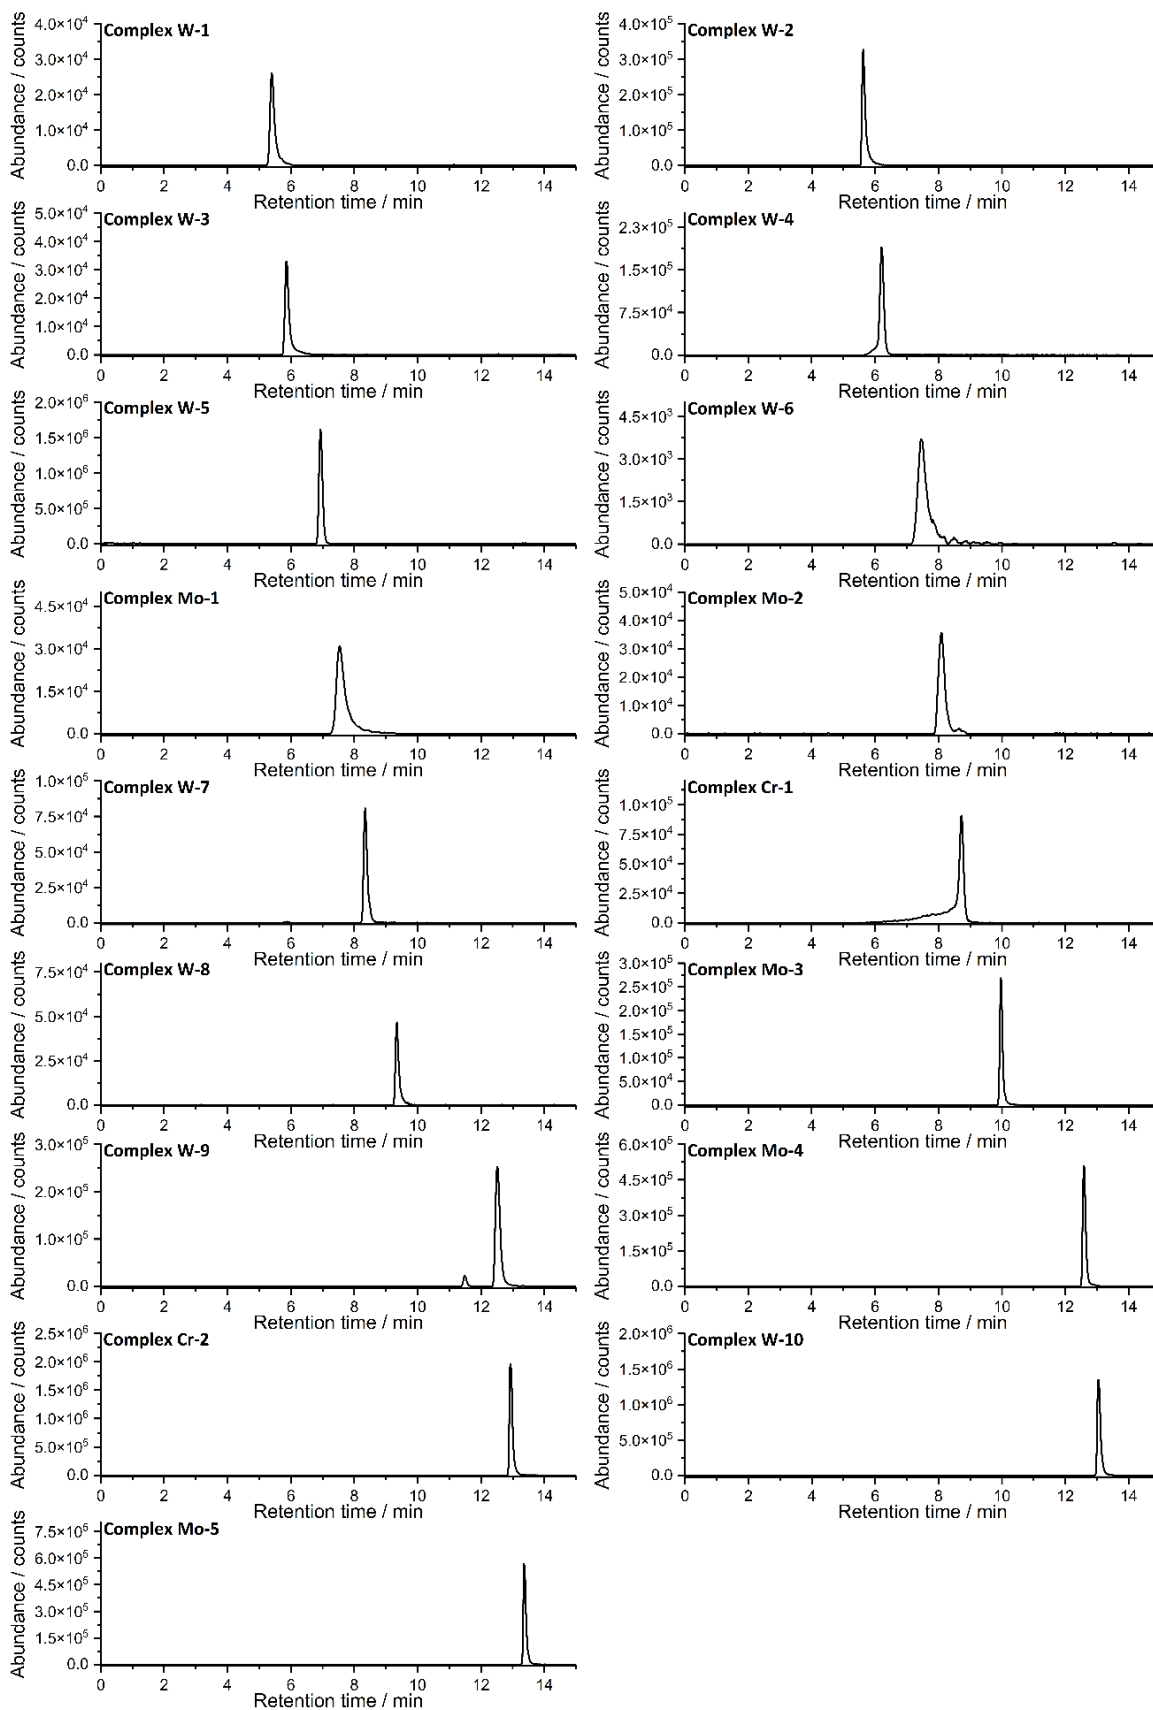

**Supplementary Figure S1:** Extracted ion chromatograms of the herein investigated complexes.

**Supplementary Table S2:** Charged species, drift times and  $^{DT}CCS_{N_2}$  of the herein investigated complex species (n=5).

| Complex | Charged species | DT / ms | $^{DT}CCS_{N_2} / \text{\AA}^2$ | STDEV / $\text{\AA}^2$ |
|---------|-----------------|---------|---------------------------------|------------------------|
| W-1     | $[M]^+$         | 25.0    | 184.6                           | 0.1                    |
| W-2     | $[M]^+$         | 30.0    | 219.5                           | 0.3                    |
| W-3     | $[M-CO]^+$      | 32.8    | 240.0                           | 0.3                    |
| W-4     | $[M-ACN+H]^+$   | 20.5    | 153.2                           | 0.2                    |
| W-5     | $[M+H]^+$       | 22.0    | 163.3                           | 0.2                    |
| W-6     | $[M]^+$         | 36.9    | 269.9                           | 0.1                    |
| Mo-1    | $[M]^+$         | 36.2    | 264.9                           | 0.2                    |
| Mo-2    | $[M-CO+H]^+$    | 21.8    | 164.2                           | 0.2                    |
| W-7     | $[M]^+$         | 24.5    | 181.4                           | 0.1                    |
| Cr-1    | $[M]^+$         | 24.3    | 180.2                           | 0.1                    |
| W-8     | $[M+H]^+$       | 24.6    | 180.9                           | 0.2                    |
| Mo-3    | $[M-CO+H]^+$    | 23.5    | 173.7                           | 0.3                    |
| W-9     | $[M+H]^+$       | 28.2    | 206.0                           | 0.1                    |
| Mo-4    | $[M+NH_4]^+$    | 28.7    | 211.1                           | 0.1                    |
| Cr-2    | $[M+H]^+$       | 29.1    | 214.5                           | 0.2                    |
| W-10    | $[M+H]^+$       | 29.5    | 216.2                           | 0.2                    |
| Mo-5    | $[M+H]^+$       | 29.4    | 216.1                           | 0.2                    |

DT: drift time;  $^{DT}CCS_{N_2}$ : collision cross section; STDEV: standard deviation; ACN: acetonitrile

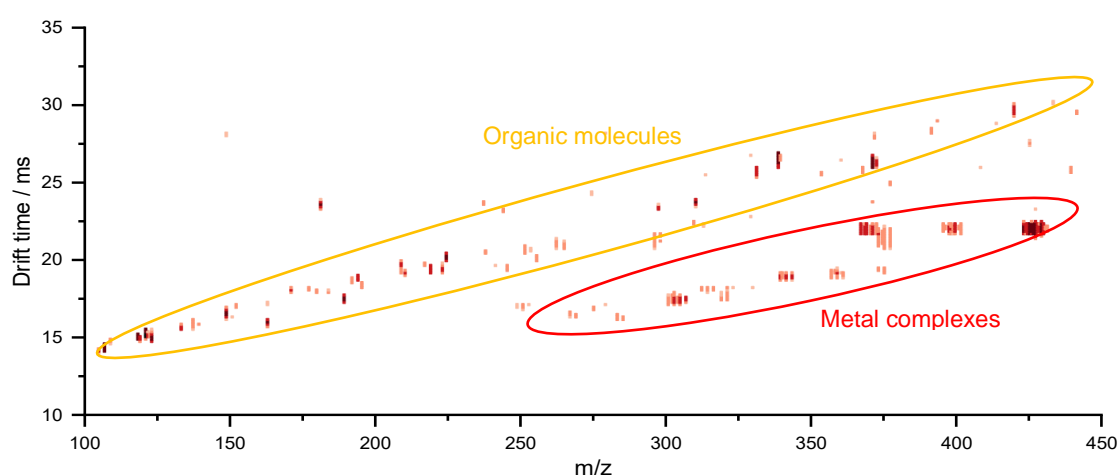

**Supplementary Figure S3:** Drift time versus  $m/z$  spectrum. Metal complex signals deviate from the main organic molecule trend, appearing at shorter drift times for comparable  $m/z$  values.

**Supplementary Table S3:** Isotopologue pattern and assigned metal center according to the trends seen in Figure 7 for unknown products / by-products / contaminations of several W or Mo reaction mixtures.

| Reaction mixture | $m/z$  | RT / min | DT / ms | $^{DT}CCS_{N_2} / \text{\AA}^2$ | Isotopologue pattern | Metal according to trend |
|------------------|--------|----------|---------|---------------------------------|----------------------|--------------------------|
| <b>1 - Mo</b>    | 328.00 | 4.7      | 21.0    | 156.6                           | Mo                   | Mo                       |
|                  | 540.07 | 5.9      | 27.1    | 199.1                           | Mo                   | Mo                       |
|                  | 747.06 | 9.1      | 31.6    | 243.9                           | Mo                   | Mo                       |
|                  | 696.13 | 7.8      | 32.0    | 234.2                           | Mo                   | Mo                       |
|                  | 668.13 | 7.8      | 31.2    | 228.7                           | Mo                   | Mo                       |
|                  | 640.14 | 7.8      | 31.0    | 226.8                           | Mo                   | Mo                       |
|                  | 457.02 | 7.8      | 26.1    | 192.6                           | Mo                   | Mo                       |
|                  | 547.08 | 7.8      | 28.4    | 208.4                           | Mo                   | Mo                       |
| <b>2 - Mo</b>    | 431.00 | 7.8      | 24.0    | 177.3                           | Mo                   | Mo                       |
| <b>3 - Mo</b>    | 386.89 | 5.8      | 20.5    | 152.3                           | inconclusive         | W                        |
|                  | 425.05 | 12.0     | 24.4    | 180.3                           | Mo                   | Mo                       |
|                  | 481.03 | 12.0     | 25.7    | 189.8                           | Mo                   | Mo                       |
| <b>4 - Mo</b>    | 345.91 | 7.6      | 19.1    | 142.2                           | inconclusive         | W                        |
| <b>5 - Mo</b>    | 321.92 | 4.8      | 19.9    | 148.3                           | inconclusive         | Mo                       |
| <b>6 - W</b>     | 782.17 | 8.1      | 32.1    | 234.4                           | W                    | W                        |
|                  | 663.13 | 7.4      | 28.8    | 210.9                           | W                    | W                        |
|                  | 577.14 | 7.4      | 26.3    | 193.2                           | W                    | W                        |
|                  | 489.08 | 7.2      | 23.2    | 170.7                           | W                    | W                        |
|                  | 523.10 | 5.8      | 24.4    | 179.4                           | W                    | W                        |
|                  | 412.03 | 5.8      | 20.6    | 152.3                           | W                    | W                        |
|                  | 437.05 | 6.9      | 24.1    | 178.3                           | Mo                   | Mo                       |

RT: retention time; DT: drift time;  $^{DT}CCS_{N_2}$ : collision cross section;

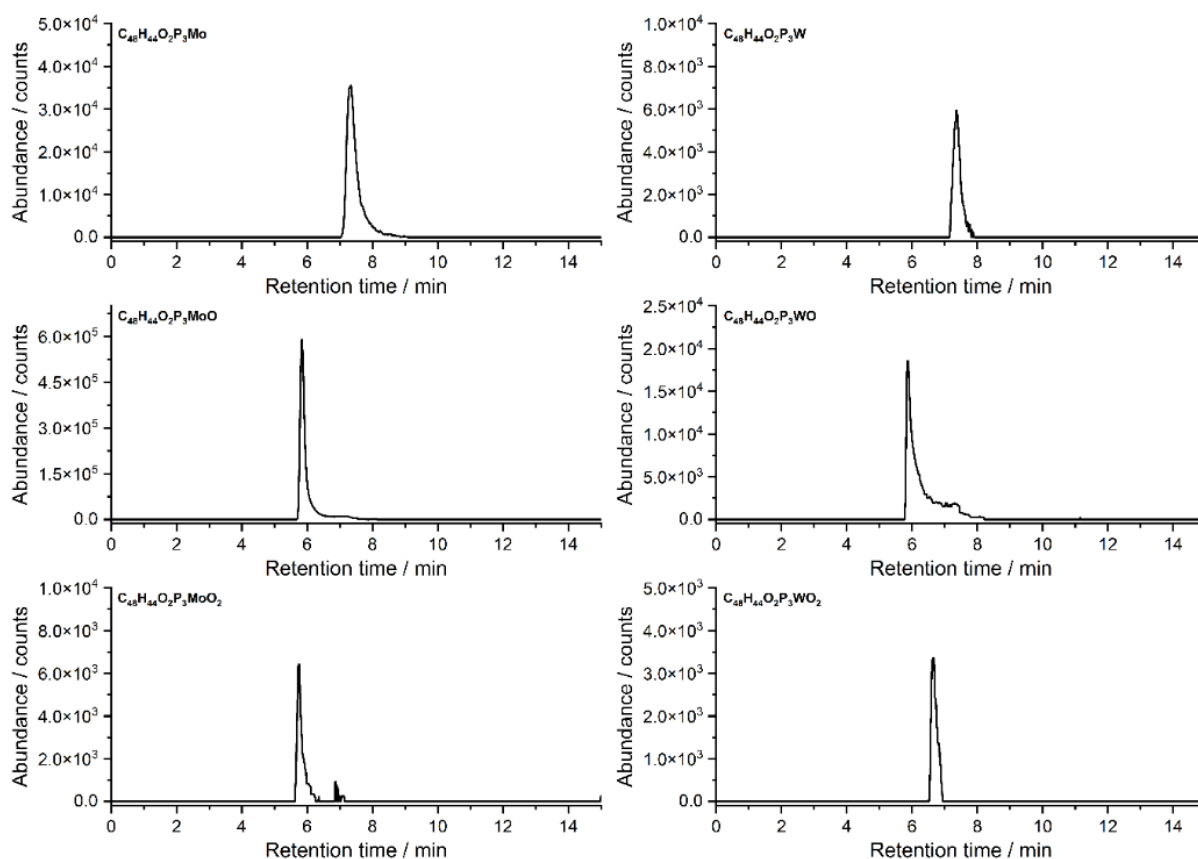

**Supplementary Figure S4:** Extracted ion chromatograms of once and twice oxidized species of Mo-1 (left) and W-6 (right).

### References:

1. Loos, M., Gerber, C., Corona, F., Hollender, J. & Singer, H. Accelerated Isotope Fine Structure Calculation Using Pruned Transition Trees. *Anal. Chem.* **87**, 5738–5744 (2015).
