# Supplementary material
Source: Research Square preprint supplement (doi:10.21203/rs.3.rs-8947555/v1)

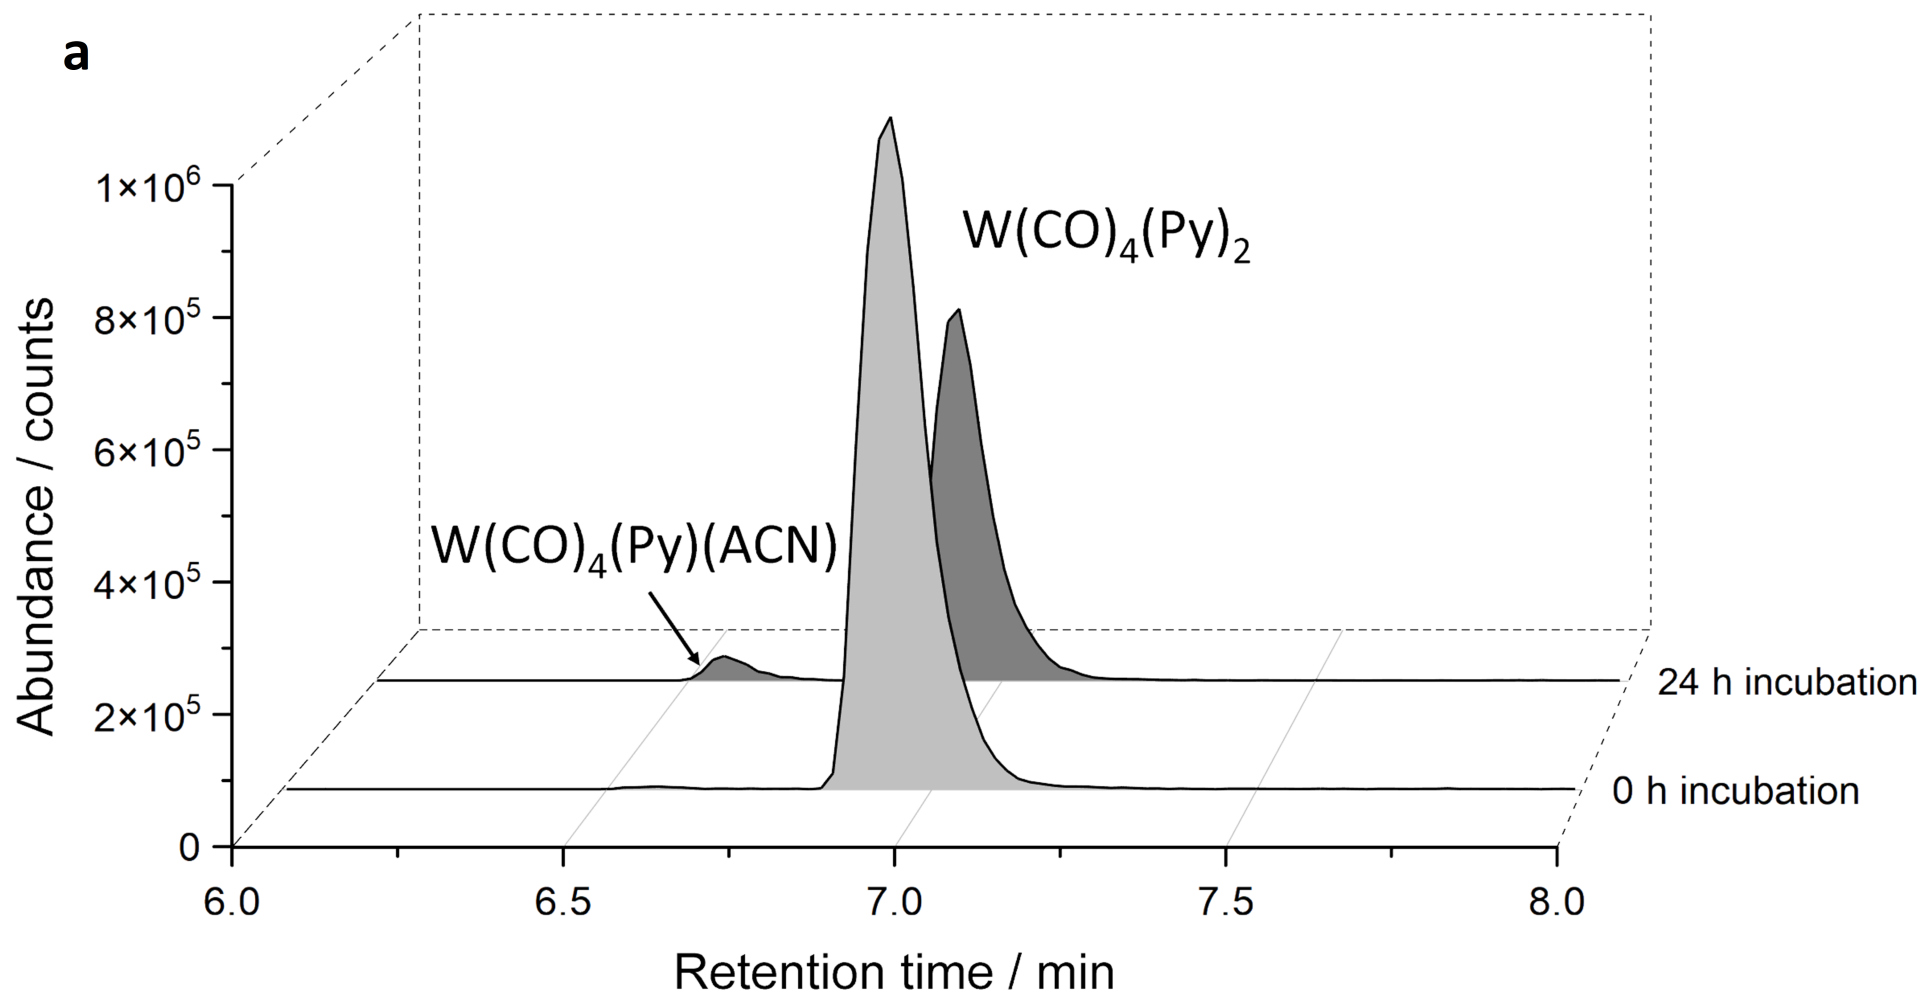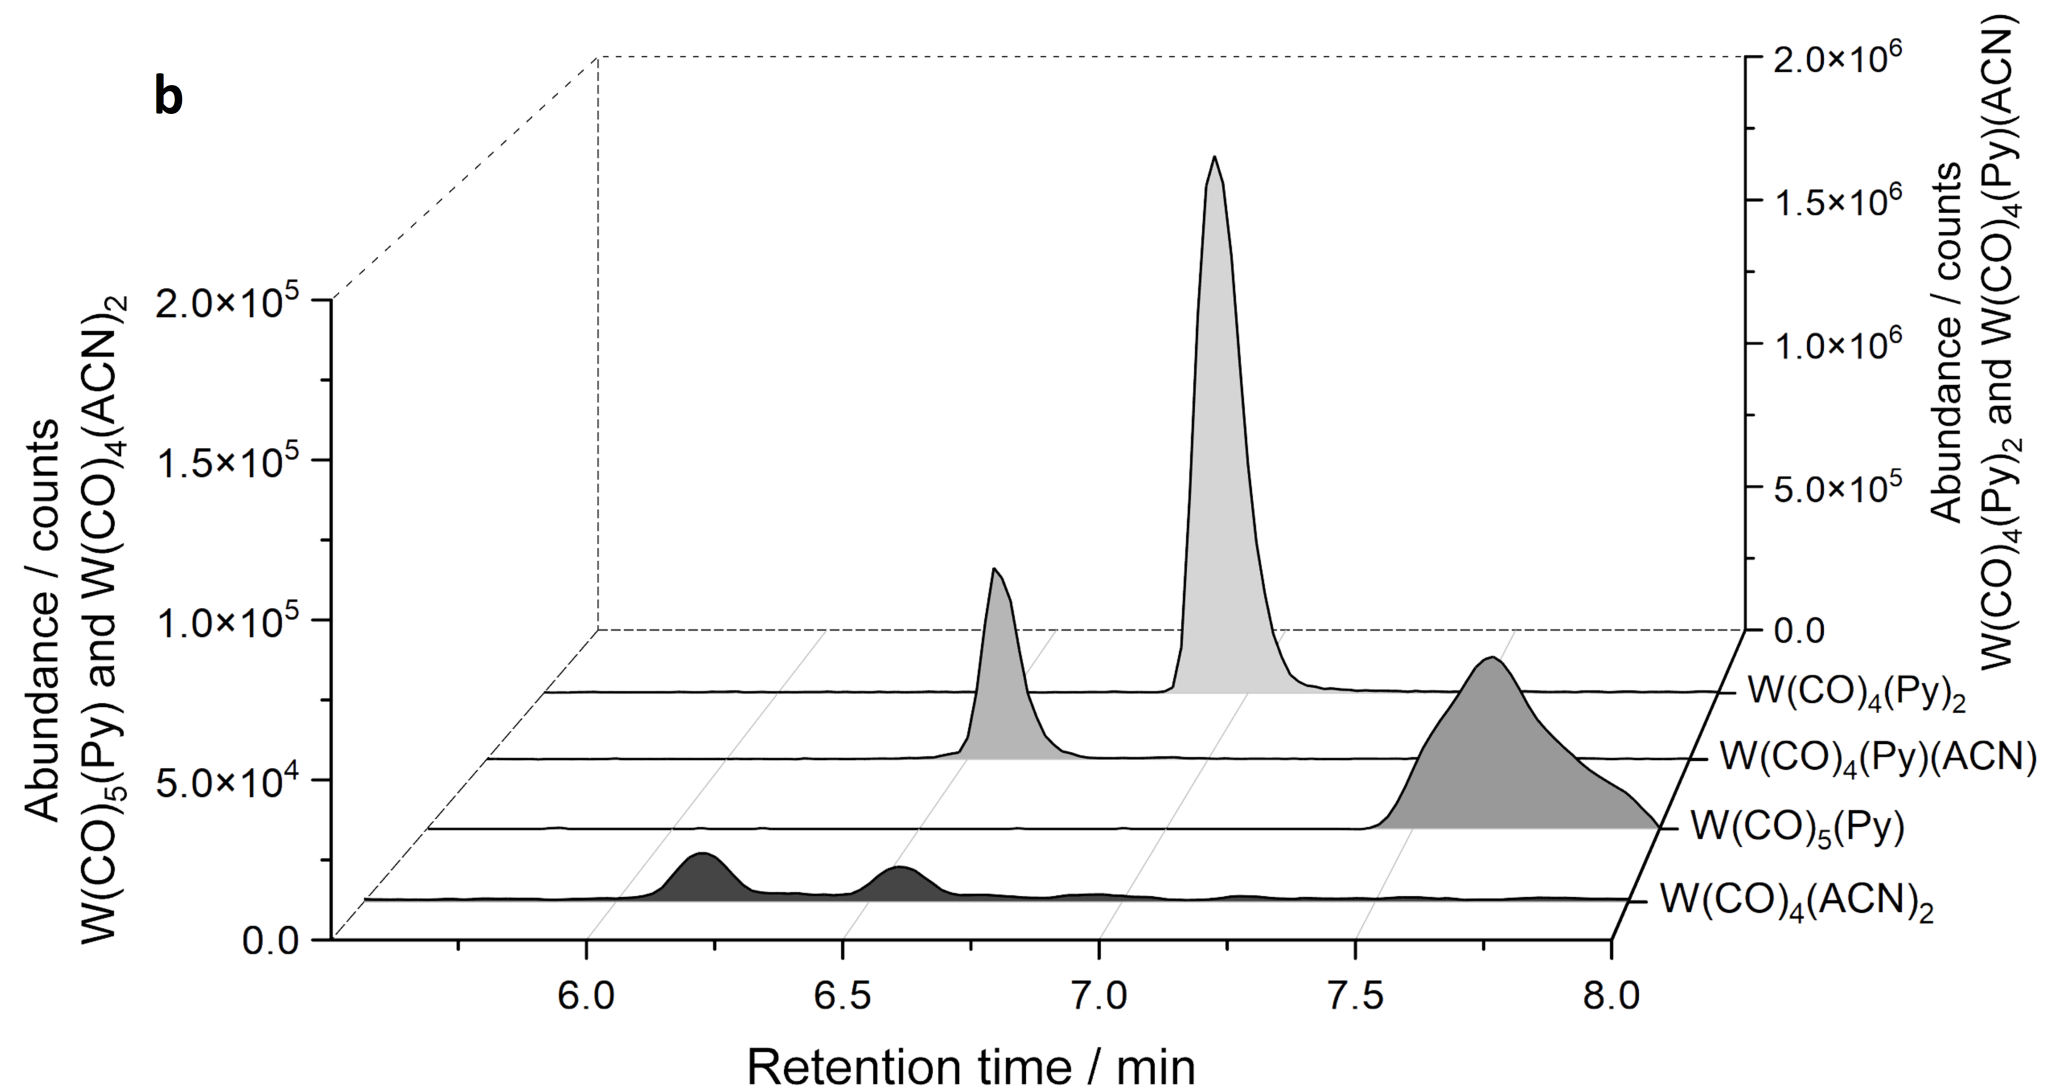

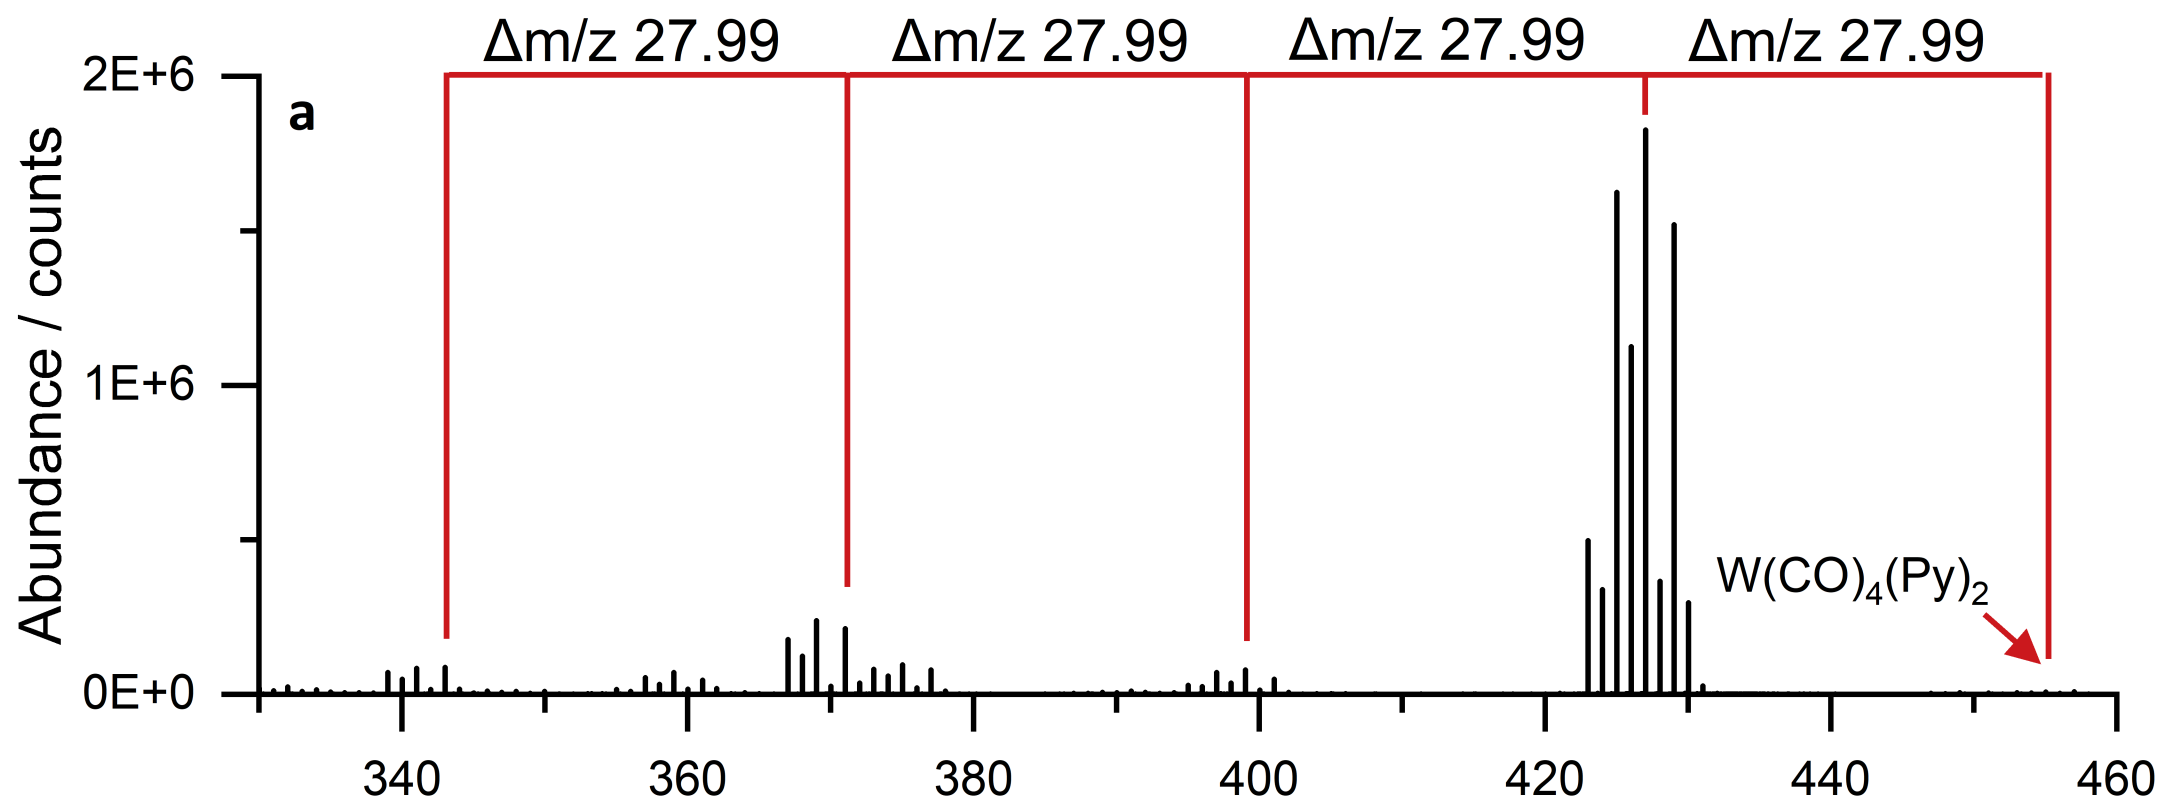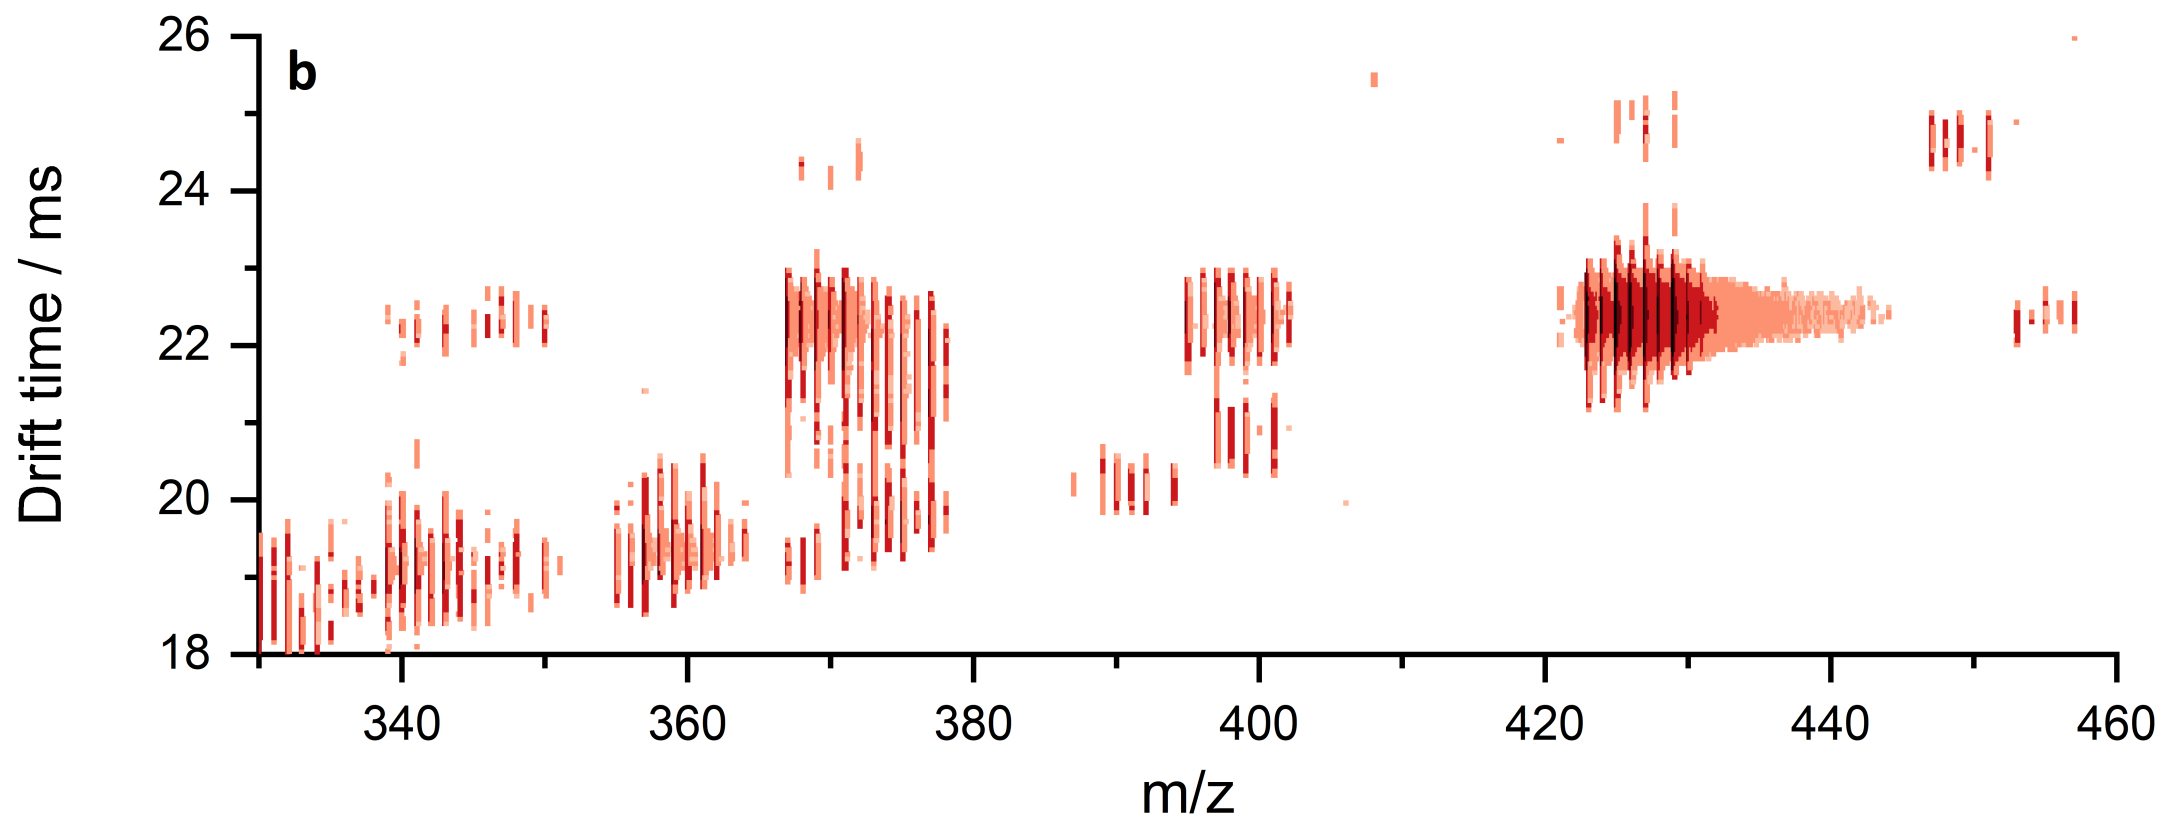

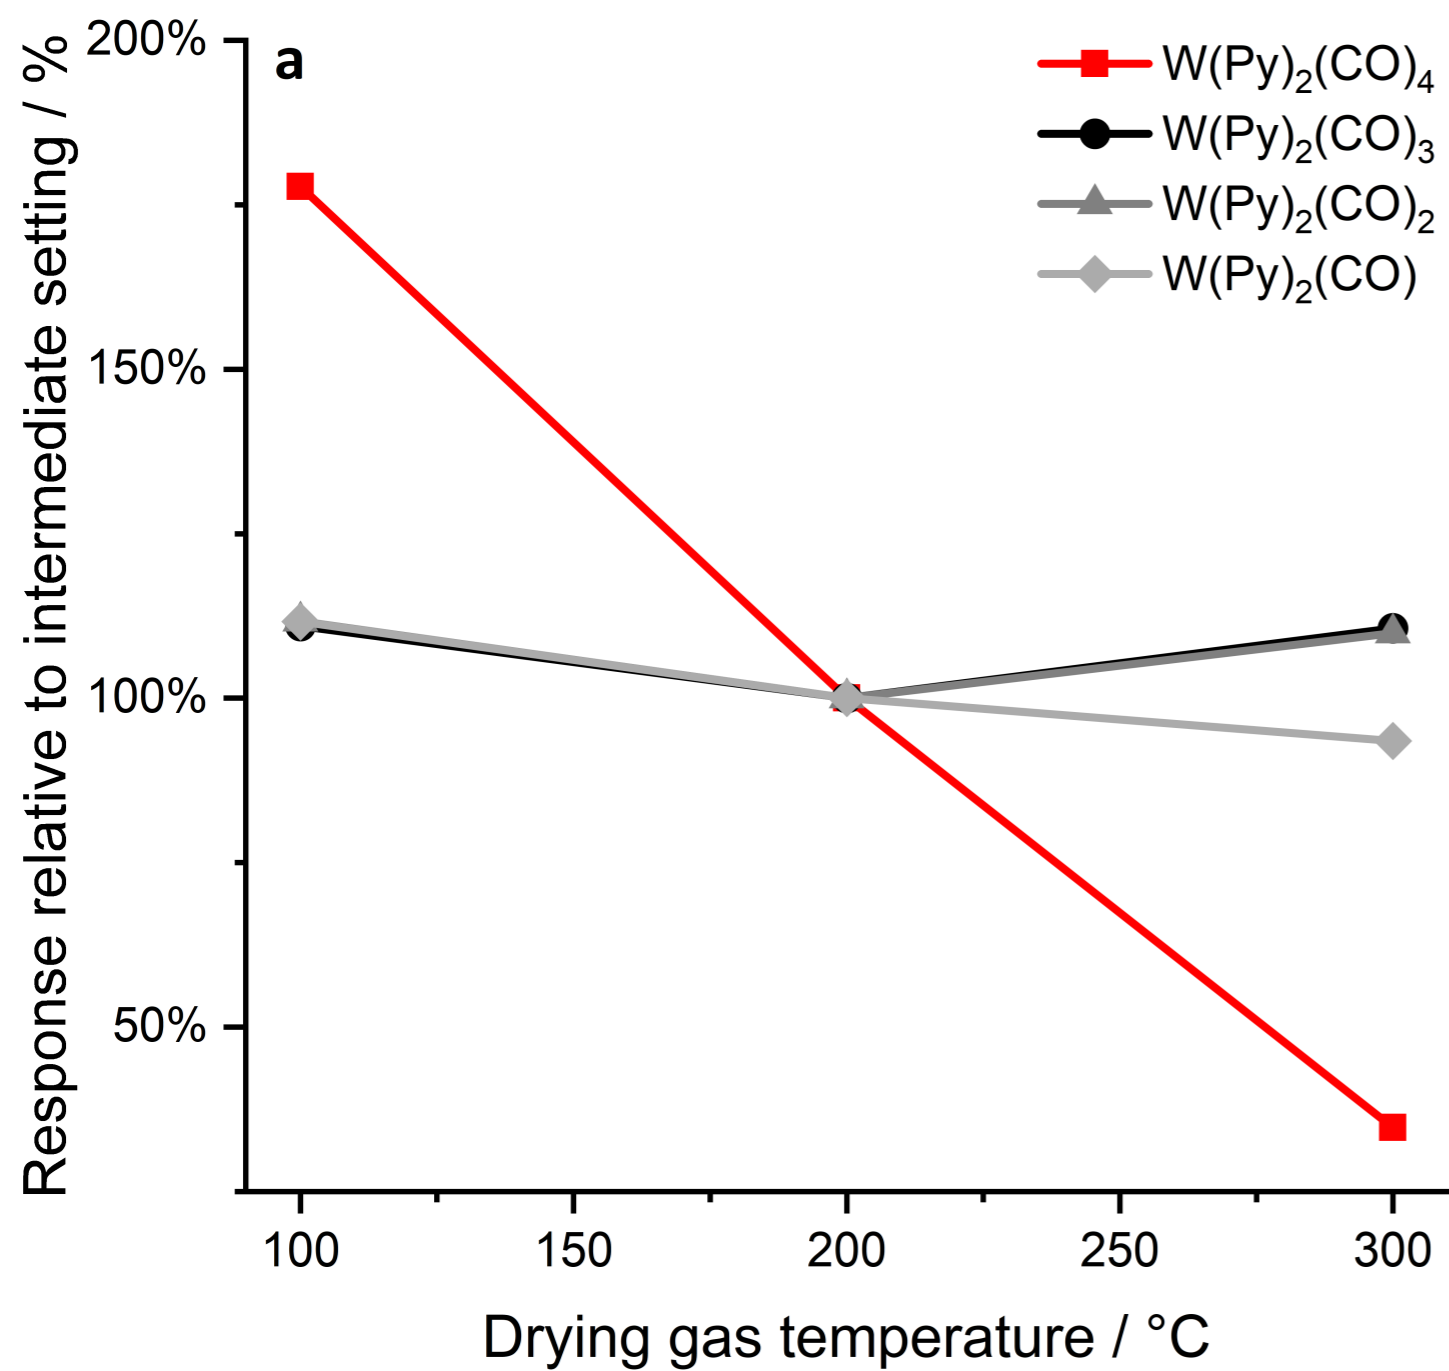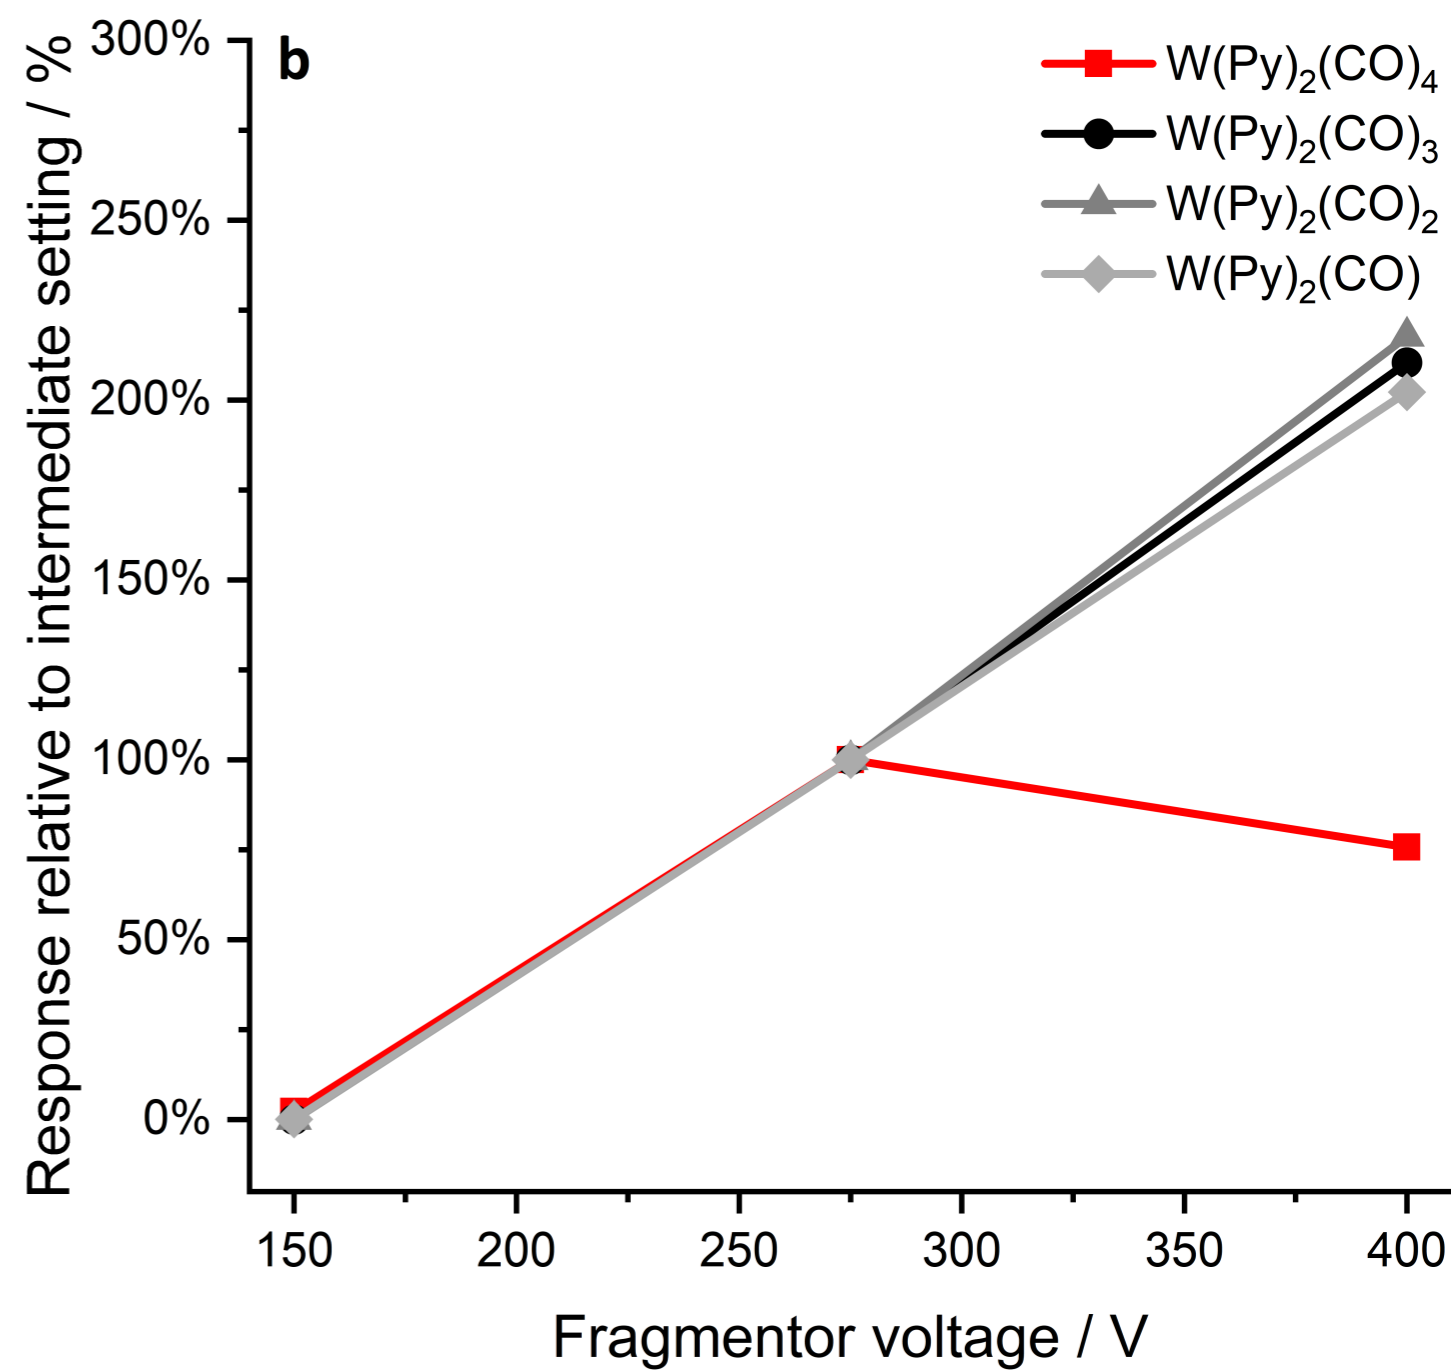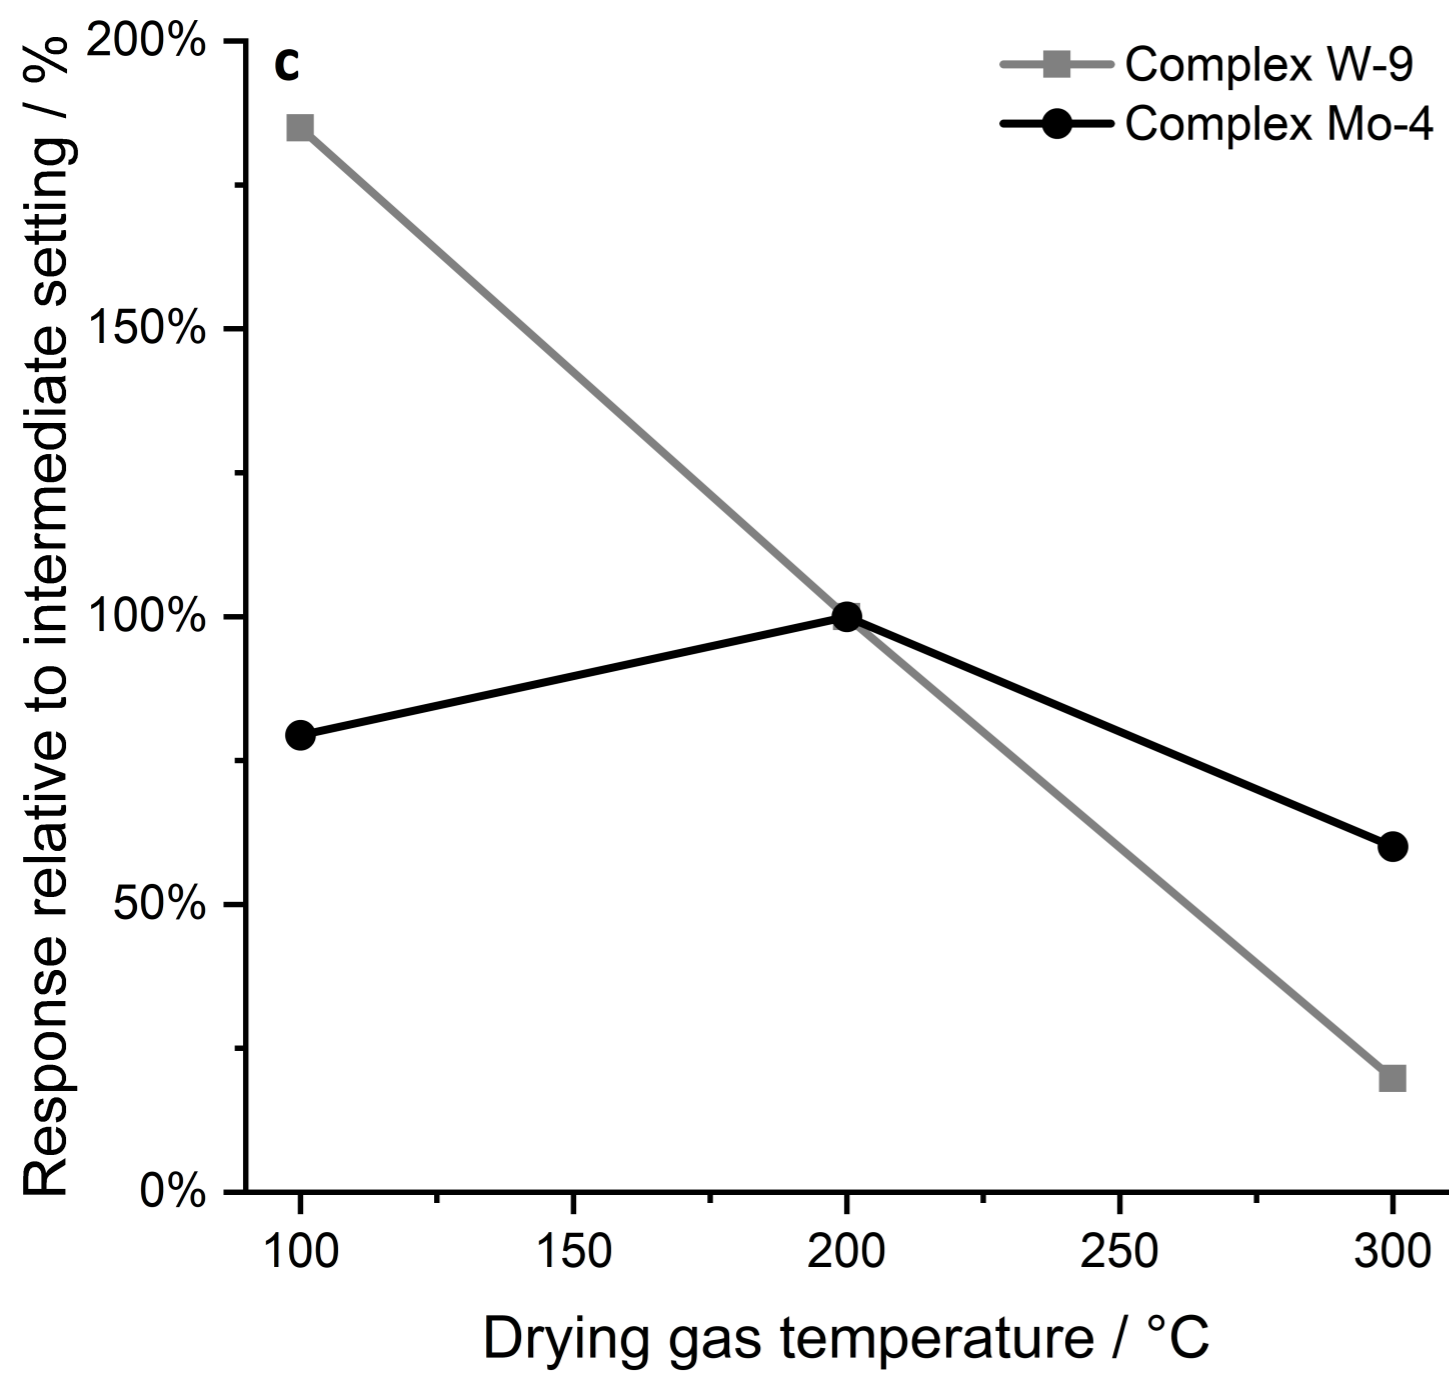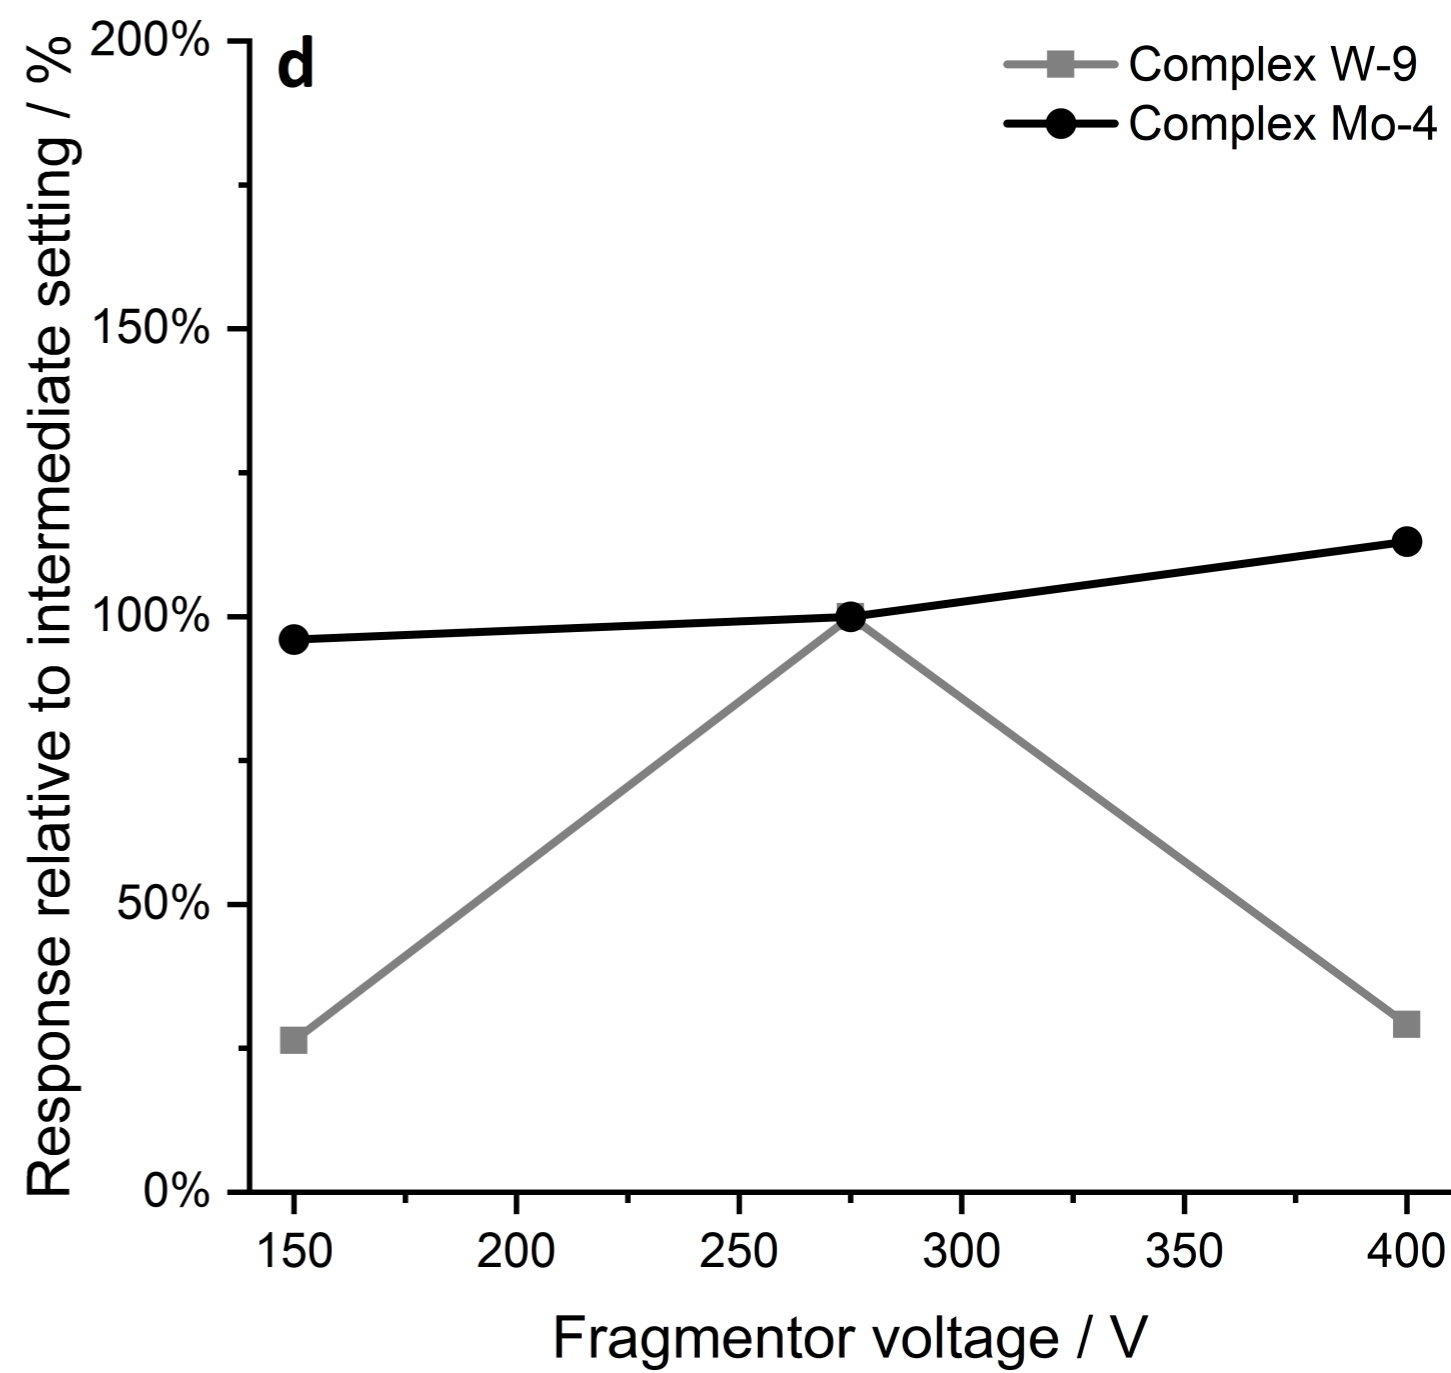

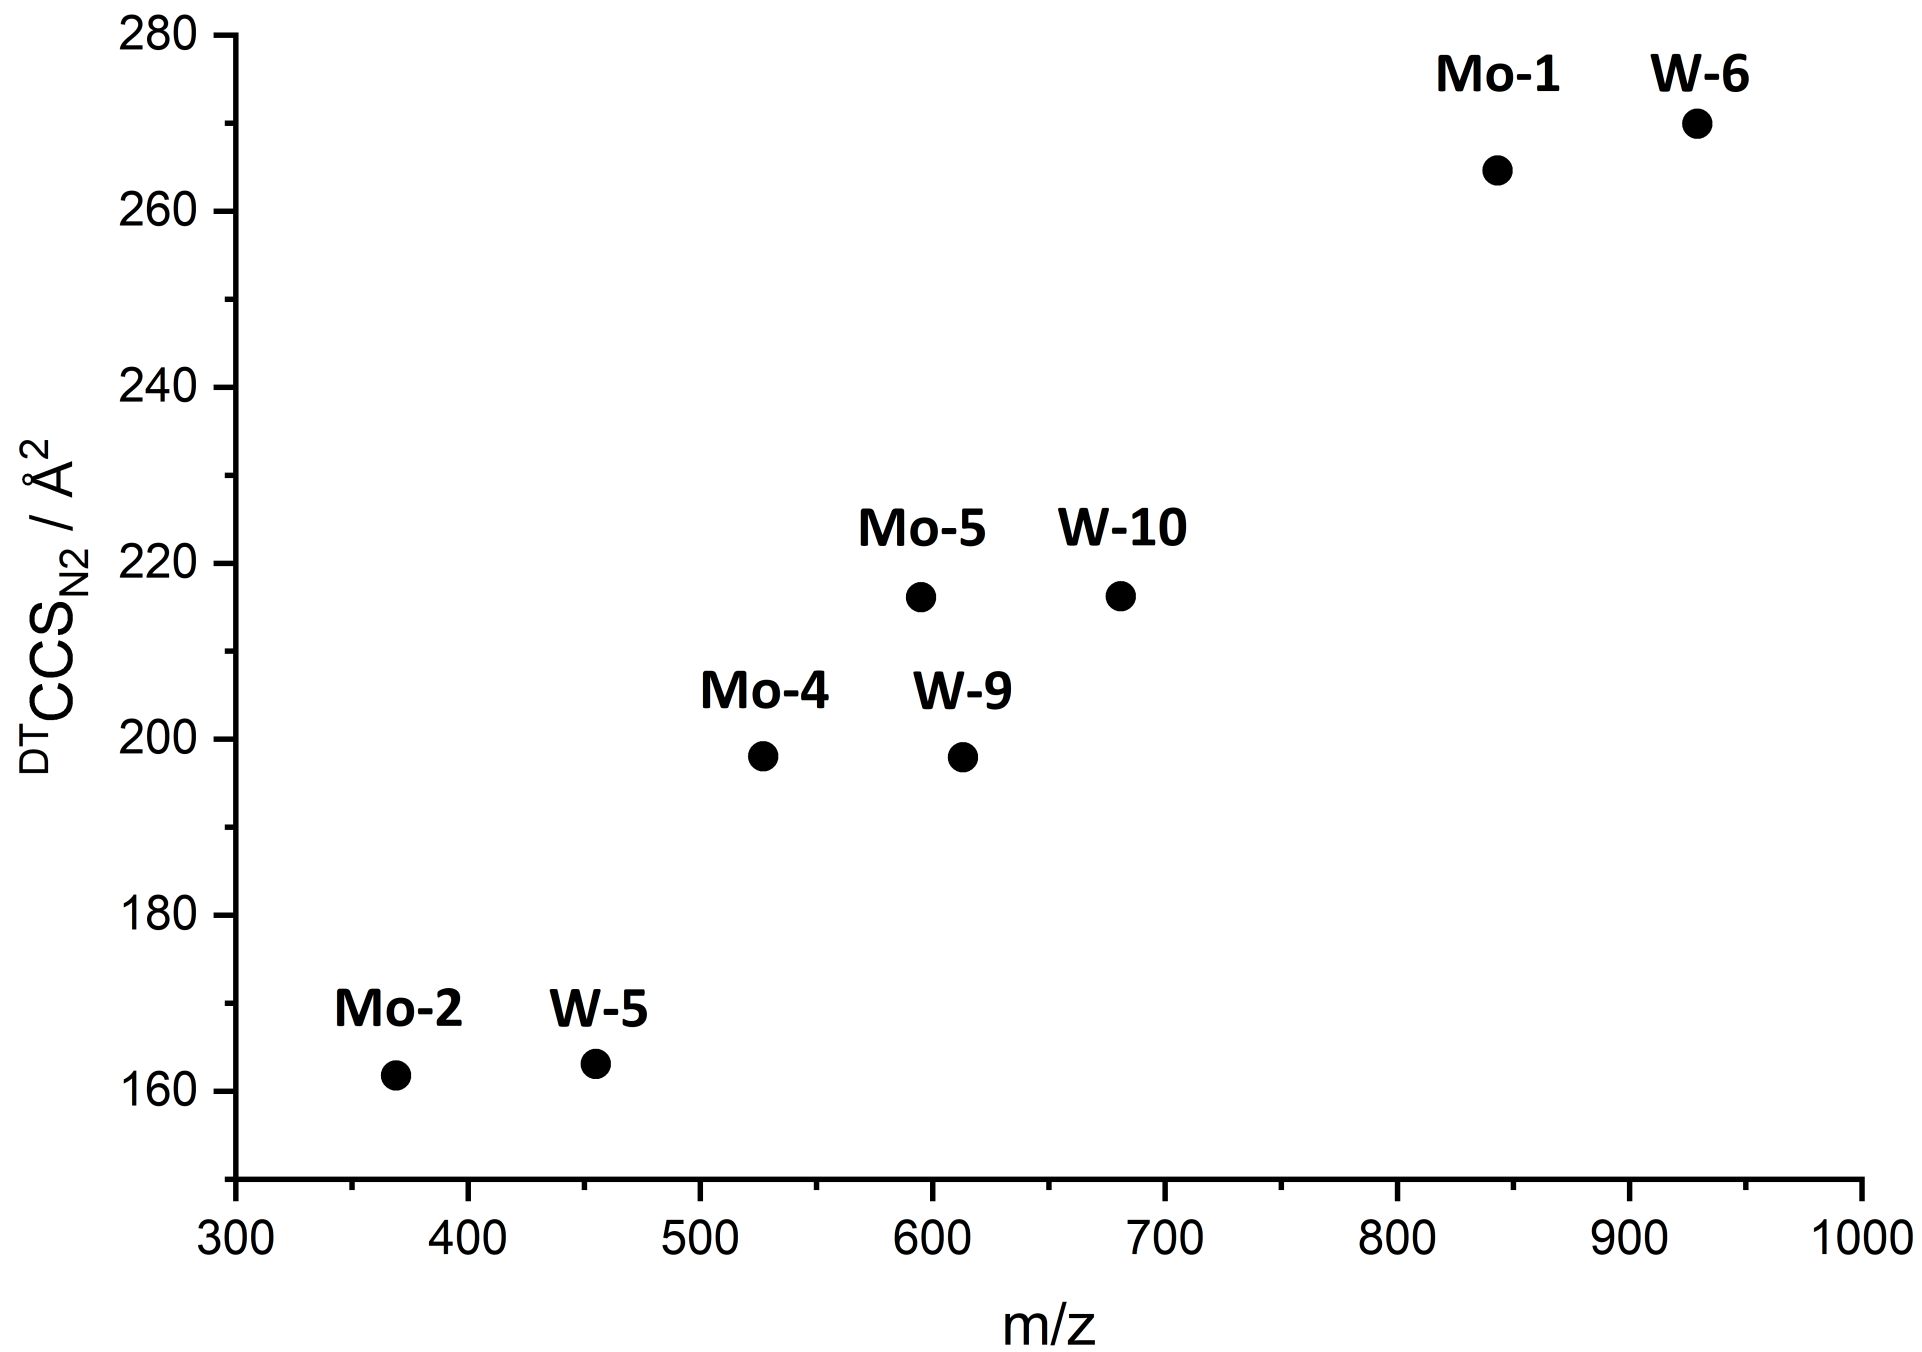

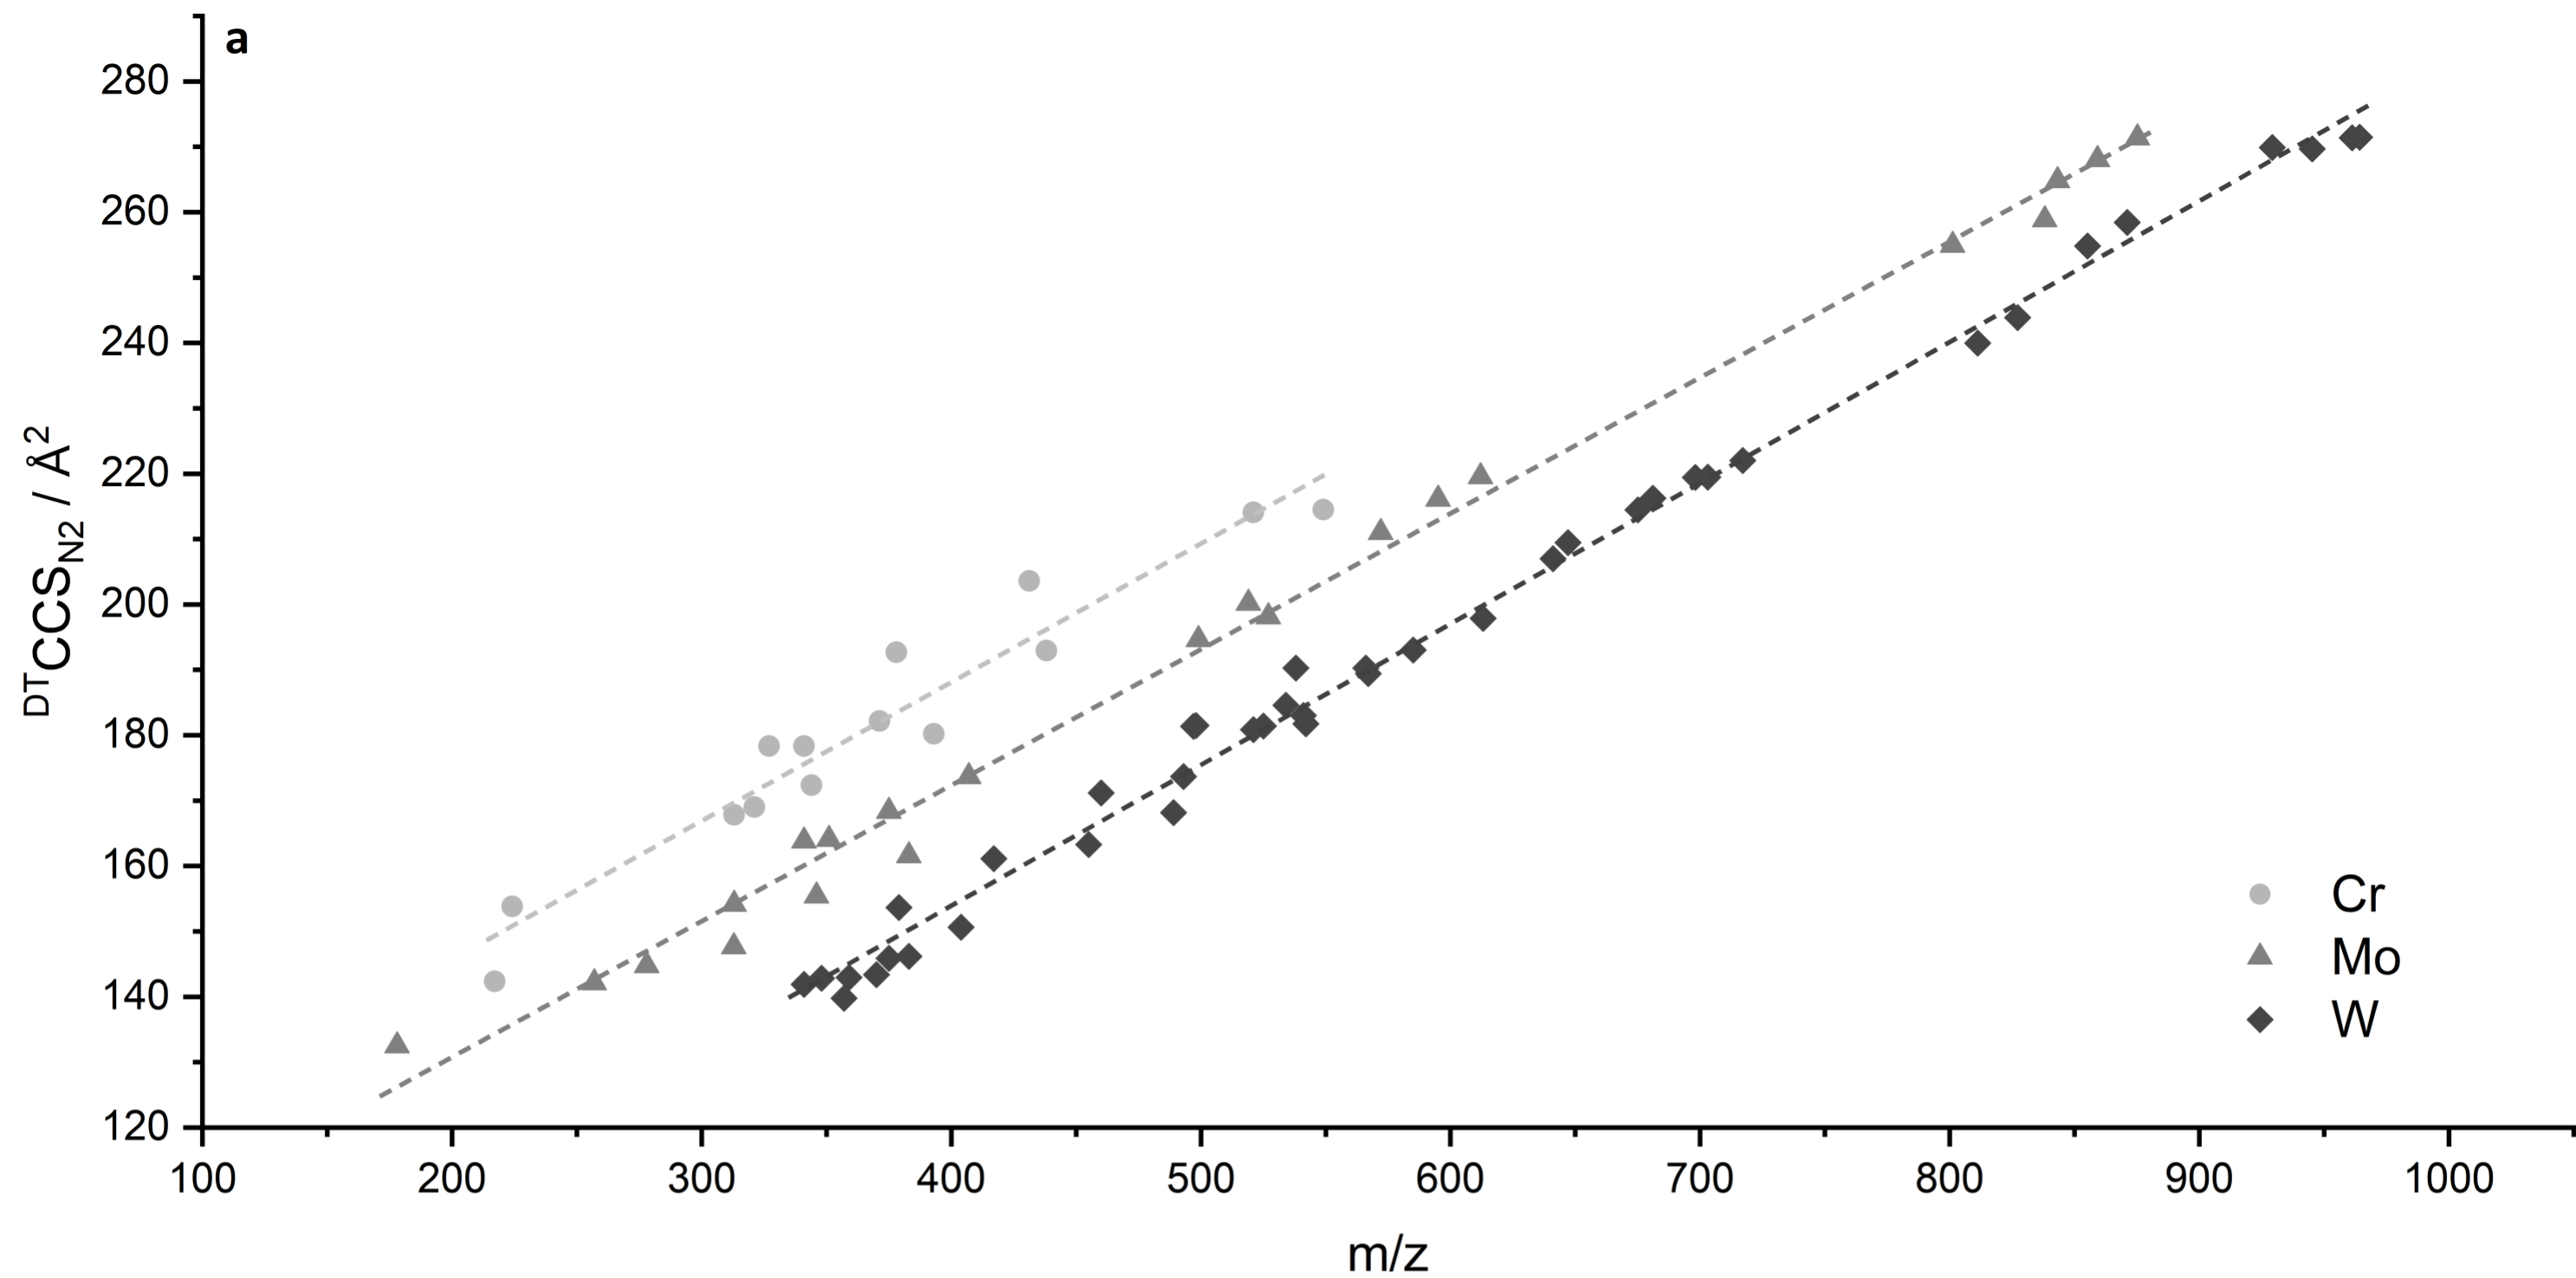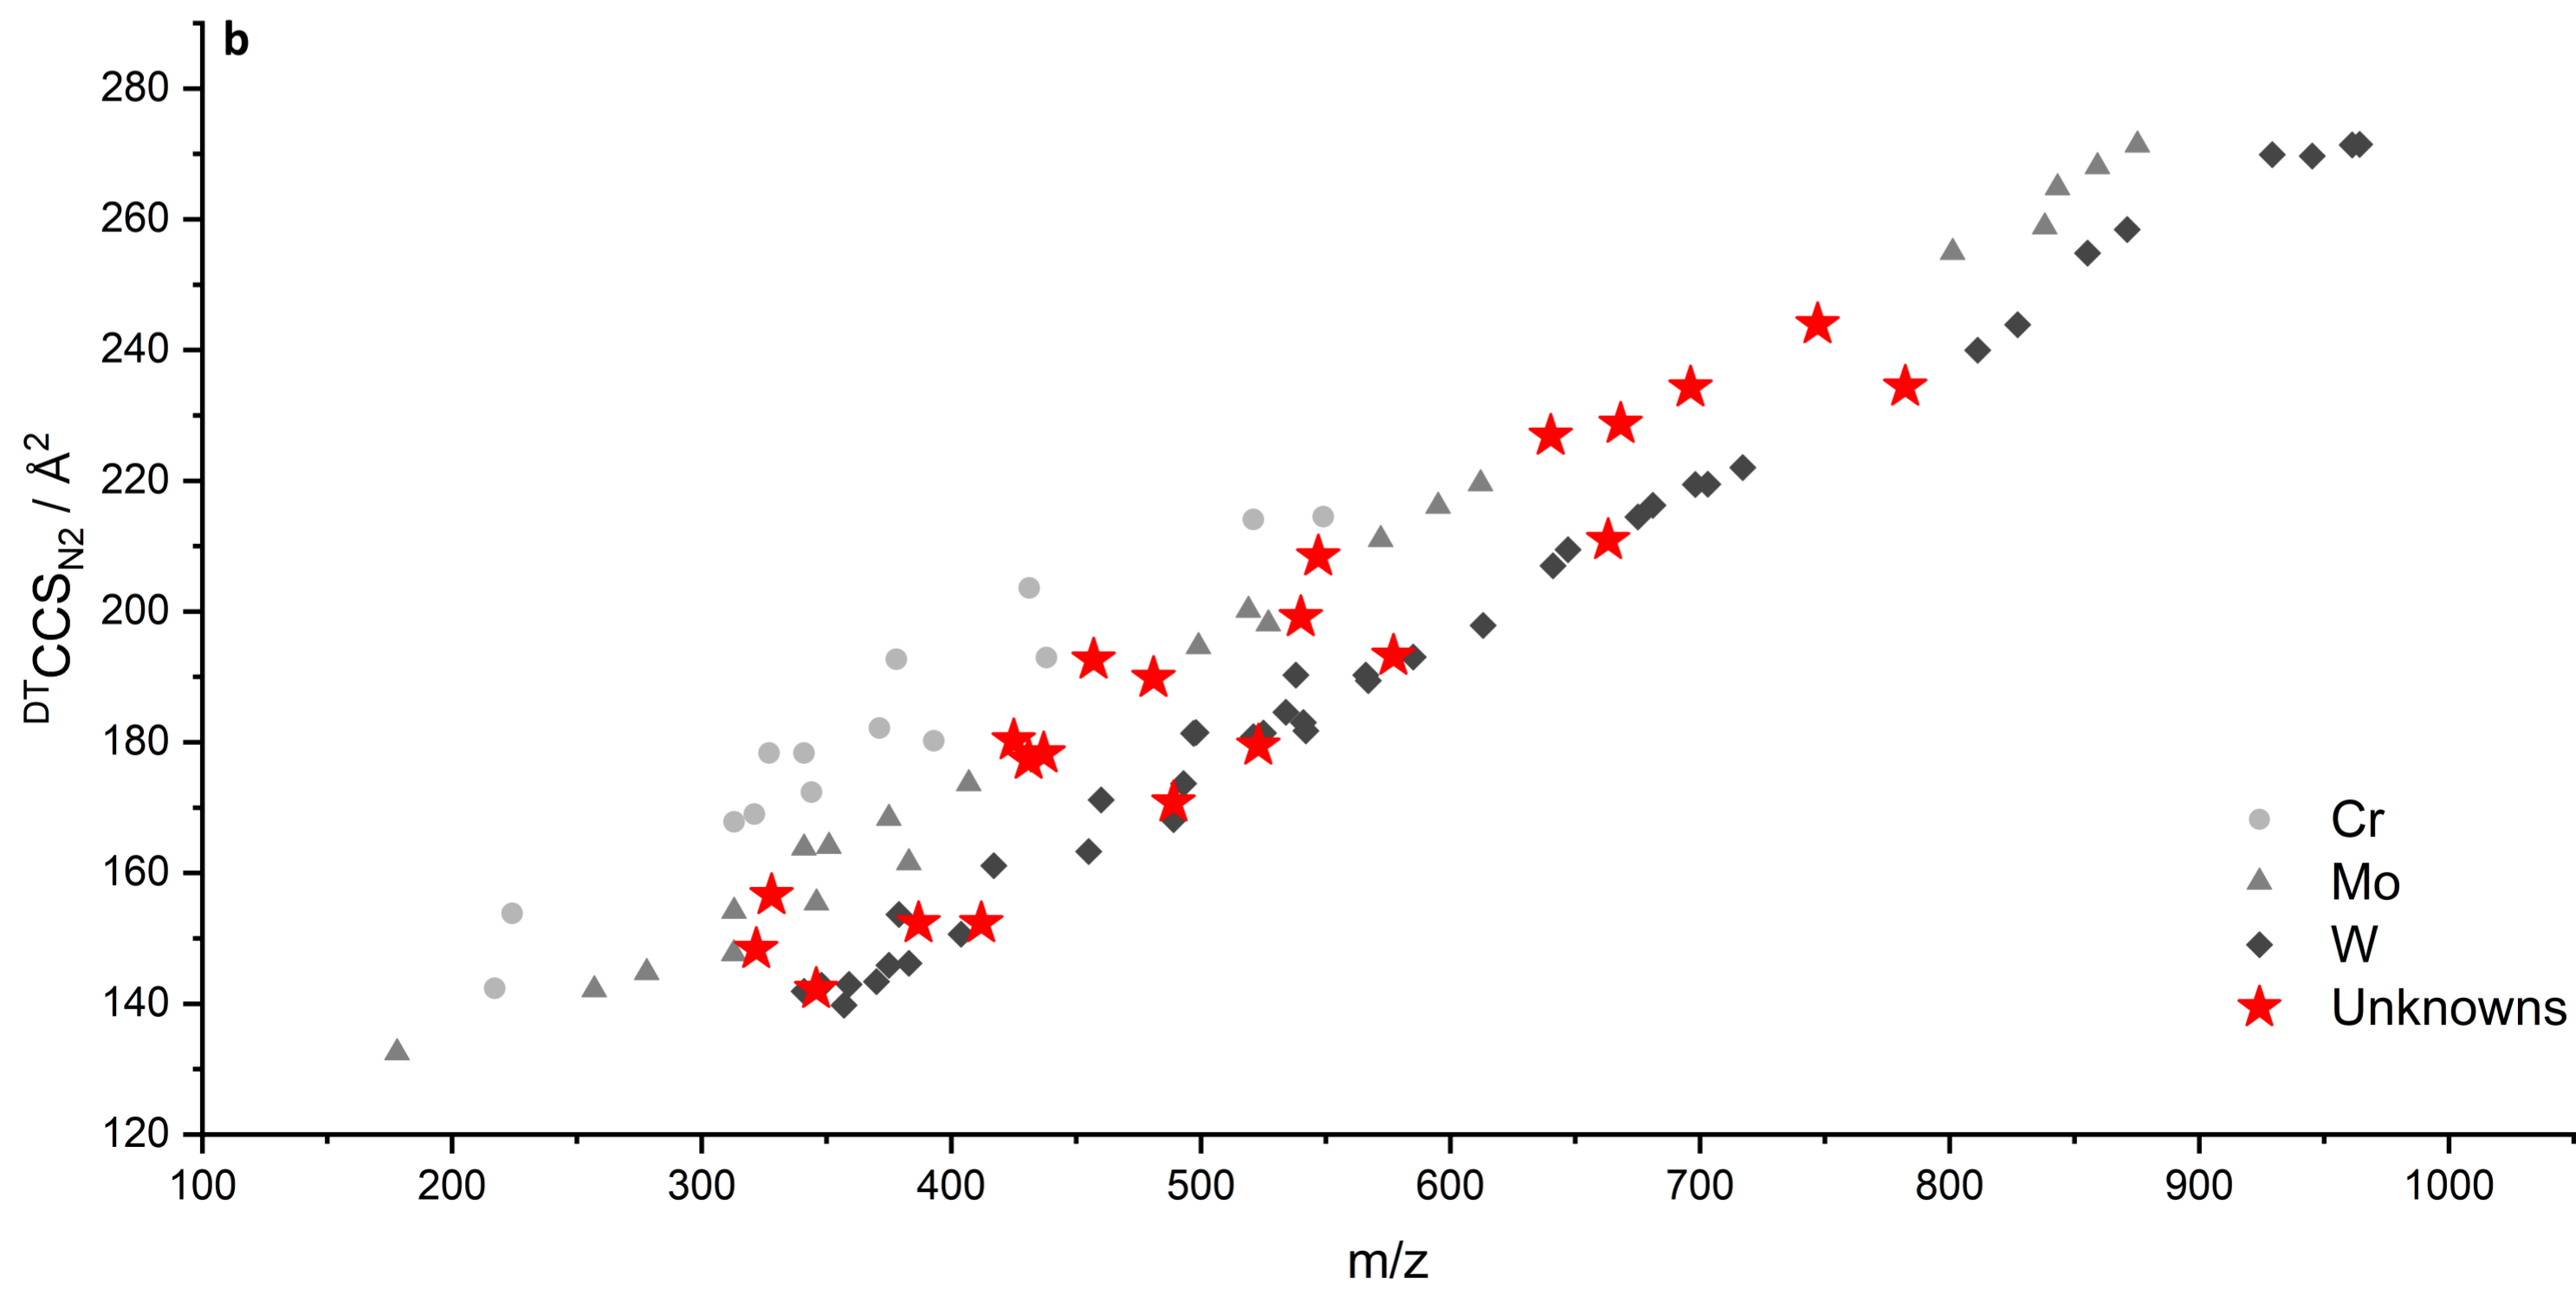

Supplement: Supplementary file 2 [file 45b712e508bf9ceeaac24a2c.pdf]
